# Supplementary material
Source: Springer Nature journal article supplement (https://www.springermedizin.de/resource/supplementary/12877_2011_727_MOESM1_ESM.pdf/9440078)

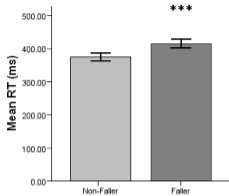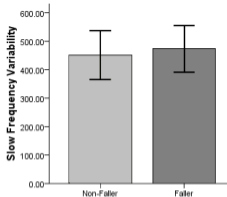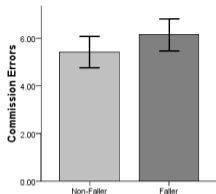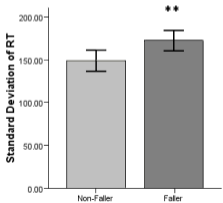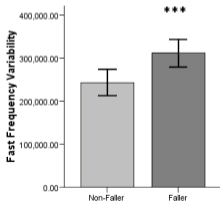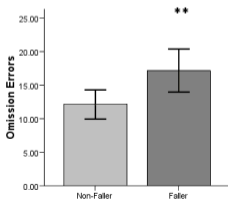

Supplement: MOESM1 [file 9440078]
